# Supplementary material for: Ethische Entscheidungen in zunehmend ökonomisierten Krankenhäusern
Source: Springer Nature journal article supplement (doi:10.1007/s10354-020-00742-5), 2020-02-28

1. Dr. N. arbeitet in der Allgemeinchirurgie in einem Krankenhaus der Regionalversorgung, das von einem privaten Krankenhausbetreiber übernommen wurde. Zwischen Betreiber und dem Chefarzt, Prof. H., wurde eine konkrete Vereinbarung über die Reduzierung der Liegezeiten abgeschlossen. Dr. N. hat deshalb in den letzten Wochen schon mehrfach Patienten auf Anweisung des Chefarztes entlassen müssen, die ihm dafür eigentlich zu krank erschienen.

Heute wurde beschlossen, dass Dr. N. die alleinlebende 78-jährige Patientin Frau A. nach Hause entlassen soll, obwohl sie noch nicht mobilisiert ist und ab und an leichtes Fieber hat.

Die Tochter von Frau A. ist verzweifelt und bittet Dr. N. inständig, ihre Mutter noch ein paar Tage im Krankenhaus zu behalten.

Hinzu kommt, dass die Tochter als alleinerziehende Mutter ca. 300 Kilometer entfernt wohnt, und bislang weder sie noch das Krankenhaus eine andere Weiterversorgung von Frau A. organisieren konnten.

| Dr. N. zögert noch ...                           | im Krankenhaus belassen |                       |                       |                       | aus dem Krankenhaus entlassen |
|--------------------------------------------------|-------------------------|-----------------------|-----------------------|-----------------------|-------------------------------|
| Wie würden Sie an Stelle von Dr. N. entscheiden? | <input type="radio"/>   | <input type="radio"/> | <input type="radio"/> | <input type="radio"/> | <input type="radio"/>         |

Dr. N. beschließt in diesem Fall nochmals das Gespräch mit Prof. H. zu suchen, da dieser schon früher ähnlich schwierige, persönliche Problemkonstellationen entschieden hat.

|                                                    |                       |                       |                       |                       |                       |                       |
|----------------------------------------------------|-----------------------|-----------------------|-----------------------|-----------------------|-----------------------|-----------------------|
| Wie würden Sie an Stelle von Prof. H. entscheiden? | <input type="radio"/> |
|----------------------------------------------------|-----------------------|-----------------------|-----------------------|-----------------------|-----------------------|-----------------------|

| Wie wichtig ist für Sie ...                                            | sehr wichtig          |                       |                       |                       | überhaupt nicht wichtig |
|------------------------------------------------------------------------|-----------------------|-----------------------|-----------------------|-----------------------|-------------------------|
| ... die Identifikation mit dem Klinikum und dessen Interessen?         | <input type="radio"/>   |
| ... die persönliche Beziehung zur Patientin und ihrem privaten Umfeld? | <input type="radio"/>   |
| ... die medizinische Korrektheit bei dieser Entscheidung?              | <input type="radio"/>   |

2.

Ich bin... weiblich  männlich  divers  keine Angaben  Geburtsjahr

|                                                                                                                                              |                                            |
|----------------------------------------------------------------------------------------------------------------------------------------------|--------------------------------------------|
| a) Student/in im <input style="width: 50px;" type="text"/> Fachsemester, angestrebter Fachbereich <input style="width: 300px;" type="text"/> | noch offen <input type="radio"/>           |
| b) Assistenzarzt/ärztin in folgendem Fachbereich                                                                                             | <input style="width: 400px;" type="text"/> |
| c) Oberarzt/ärztin in folgendem Fachbereich                                                                                                  | <input style="width: 400px;" type="text"/> |
| d) Leitende/r Oberarzt/ärztin in folgendem Fachbereich                                                                                       | <input style="width: 400px;" type="text"/> |
| e) Chefarzt/ärztin in folgendem Fachbereich                                                                                                  | <input style="width: 400px;" type="text"/> |

Für b) – d) Ich arbeite an einem Haus der...

Grund- und Regelversorgung       Schwerpunktversorgung       Maximalversorgung

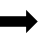

| Im Folgenden beschreibe ich Ihnen einige Personen.<br><b>Bitte sagen Sie mir, wie ähnlich oder unähnlich Ihnen die jeweils beschriebene Person ist.</b>                | Die Person ist mir ... |                       |                       |                         |                       |                       |
|------------------------------------------------------------------------------------------------------------------------------------------------------------------------|------------------------|-----------------------|-----------------------|-------------------------|-----------------------|-----------------------|
|                                                                                                                                                                        | sehr ähnlich           |                       |                       | überhaupt nicht ähnlich |                       |                       |
| Es ist der Person wichtig, neue Ideen zu entwickeln und kreativ zu sein. Sie macht Sachen gerne auf ihre eigene originelle Art und Weise.                              | <input type="radio"/>  | <input type="radio"/> | <input type="radio"/> | <input type="radio"/>   | <input type="radio"/> | <input type="radio"/> |
| Es ist der Person wichtig, reich zu sein. Sie möchte viel Geld haben und teure Sachen besitzen.                                                                        | <input type="radio"/>  | <input type="radio"/> | <input type="radio"/> | <input type="radio"/>   | <input type="radio"/> | <input type="radio"/> |
| Die Person hält es für wichtig, dass alle Menschen auf der Welt gleich behandelt werden sollten. Sie glaubt, dass jeder Mensch im Leben gleiche Chancen haben sollte.  | <input type="radio"/>  | <input type="radio"/> | <input type="radio"/> | <input type="radio"/>   | <input type="radio"/> | <input type="radio"/> |
| Es ist der Person wichtig, ihre Fähigkeiten zu zeigen. Sie möchte, dass die Leute bewundern, was sie tut.                                                              | <input type="radio"/>  | <input type="radio"/> | <input type="radio"/> | <input type="radio"/>   | <input type="radio"/> | <input type="radio"/> |
| Es ist der Person wichtig, in einem sicheren Umfeld zu leben. Sie vermeidet alles, was ihre Sicherheit gefährden könnte.                                               | <input type="radio"/>  | <input type="radio"/> | <input type="radio"/> | <input type="radio"/>   | <input type="radio"/> | <input type="radio"/> |
| Die Person mag Überraschungen und hält immer Ausschau nach neuen Aktivitäten. Sie denkt, dass im Leben Abwechslung wichtig ist.                                        | <input type="radio"/>  | <input type="radio"/> | <input type="radio"/> | <input type="radio"/>   | <input type="radio"/> | <input type="radio"/> |
| Die Person glaubt, dass die Menschen tun sollten, was man ihnen sagt. Sie denkt, dass Menschen sich immer an Regeln halten sollten, selbst dann wenn es niemand sieht. | <input type="radio"/>  | <input type="radio"/> | <input type="radio"/> | <input type="radio"/>   | <input type="radio"/> | <input type="radio"/> |
| Es ist der Person wichtig, Menschen zuzuhören, die anders sind als sie. Auch wenn sie anderer Meinung ist als andere, will sie die anderen trotzdem verstehen.         | <input type="radio"/>  | <input type="radio"/> | <input type="radio"/> | <input type="radio"/>   | <input type="radio"/> | <input type="radio"/> |
| Es ist der Person wichtig, zurückhaltend und bescheiden zu sein. Sie versucht, die Aufmerksamkeit nicht auf sich zu lenken.                                            | <input type="radio"/>  | <input type="radio"/> | <input type="radio"/> | <input type="radio"/>   | <input type="radio"/> | <input type="radio"/> |
| Es ist der Person wichtig, Spaß zu haben. Sie gönnt sich selbst gerne etwas.                                                                                           | <input type="radio"/>  | <input type="radio"/> | <input type="radio"/> | <input type="radio"/>   | <input type="radio"/> | <input type="radio"/> |
| Es ist der Person wichtig, selbst zu entscheiden, was sie tut. Sie ist gerne frei und unabhängig von anderen.                                                          | <input type="radio"/>  | <input type="radio"/> | <input type="radio"/> | <input type="radio"/>   | <input type="radio"/> | <input type="radio"/> |
| Es ist der Person sehr wichtig, den Menschen um sich herum zu helfen. Sie will für deren Wohl sorgen.                                                                  | <input type="radio"/>  | <input type="radio"/> | <input type="radio"/> | <input type="radio"/>   | <input type="radio"/> | <input type="radio"/> |
| Es ist der Person wichtig, sehr erfolgreich zu sein. Sie hofft, dass die Leute ihre Leistungen anerkennen.                                                             | <input type="radio"/>  | <input type="radio"/> | <input type="radio"/> | <input type="radio"/>   | <input type="radio"/> | <input type="radio"/> |
| Es ist der Person wichtig, dass der Staat ihre persönliche Sicherheit vor allen Bedrohungen gewährleistet. Sie will einen starken Staat, der seine Bürger verteidigt.  | <input type="radio"/>  | <input type="radio"/> | <input type="radio"/> | <input type="radio"/>   | <input type="radio"/> | <input type="radio"/> |
| Die Person sucht das Abenteuer und geht gerne Risiken ein. Sie will ein aufregendes Leben haben.                                                                       | <input type="radio"/>  | <input type="radio"/> | <input type="radio"/> | <input type="radio"/>   | <input type="radio"/> | <input type="radio"/> |
| Es ist der Person wichtig, sich jederzeit korrekt zu verhalten. Sie vermeidet es, Dinge zu tun, die andere Leute für falsch halten könnten.                            | <input type="radio"/>  | <input type="radio"/> | <input type="radio"/> | <input type="radio"/>   | <input type="radio"/> | <input type="radio"/> |
| Es ist der Person wichtig, dass andere sie respektieren. Sie will, dass die Leute tun, was sie sagt.                                                                   | <input type="radio"/>  | <input type="radio"/> | <input type="radio"/> | <input type="radio"/>   | <input type="radio"/> | <input type="radio"/> |
| Es ist der Person wichtig, ihren Freunden gegenüber loyal zu sein. Sie will sich für Menschen einsetzen, die ihr nahe stehen.                                          | <input type="radio"/>  | <input type="radio"/> | <input type="radio"/> | <input type="radio"/>   | <input type="radio"/> | <input type="radio"/> |
| Die Person ist fest davon überzeugt, dass die Menschen sich um die Natur kümmern sollten. Umweltschutz ist ihr wichtig.                                                | <input type="radio"/>  | <input type="radio"/> | <input type="radio"/> | <input type="radio"/>   | <input type="radio"/> | <input type="radio"/> |
| Tradition ist der Person wichtig. Sie versucht, sich an die Sitten und Gebräuche zu halten, die ihr von ihrer Religion oder ihrer Familie überliefert wurden.          | <input type="radio"/>  | <input type="radio"/> | <input type="radio"/> | <input type="radio"/>   | <input type="radio"/> | <input type="radio"/> |
| Die Person lässt keine Gelegenheit aus, Spaß zu haben. Es ist ihr wichtig, Dinge zu tun, die ihr Vergnügen bereiten.                                                   | <input type="radio"/>  | <input type="radio"/> | <input type="radio"/> | <input type="radio"/>   | <input type="radio"/> | <input type="radio"/> |

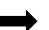

Supplement: MOESM1 [file 17752460]
